# Supplementary material for: Identification of the tumor-suppressive role of circular RNA-FOXO3 in colorectal cancer via regulation of miR-543/LATS1 axis
Source: PubMed Central journal article supplement — Oncol Rep. 2021 Sep 20;46(5):239. doi: 10.3892/or.2021.8190 (PMC8485021; doi:10.3892/or.2021.8190), 2021-09-20

Figure S1. Transfection efficiency of miR-543 mimic and si-LATS1. miR-543 expression was determined using RT-qPCR after transfection of (A) miR-543 mimic or (B) miR-543 inhibitor. (C) LATS1 expression was measured using RT-qPCR after transfection of si-LATS1. All experiments were performed three times. \*\*\* $P < 0.001$ , \*\*\*\* $P < 0.0001$  vs. corresponding NC. NC, negative control; miR, microRNA; siRNA, small interfering RNA; LATS1, Large tumor suppressor kinase 1.

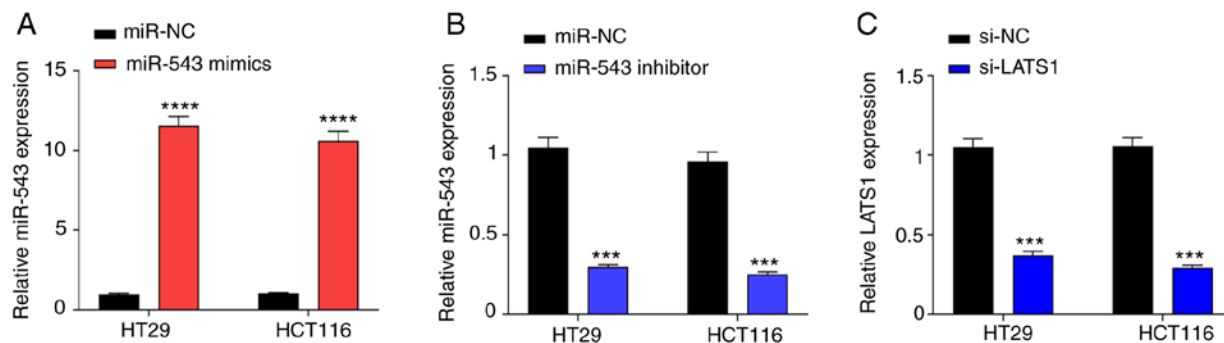

Supplement: Supplementary_Data.pdf [file Supplementary_Data.pdf]
